# Supplementary material for: Oil Quality Prediction in Olive Oil by Near-Infrared Spectroscopy: Applications in Olive Breeding
Source: MDPI journal article supplement (doi:10.3390/agriculture14050721), 2024-05-02
Supplement: s1 [file s1]

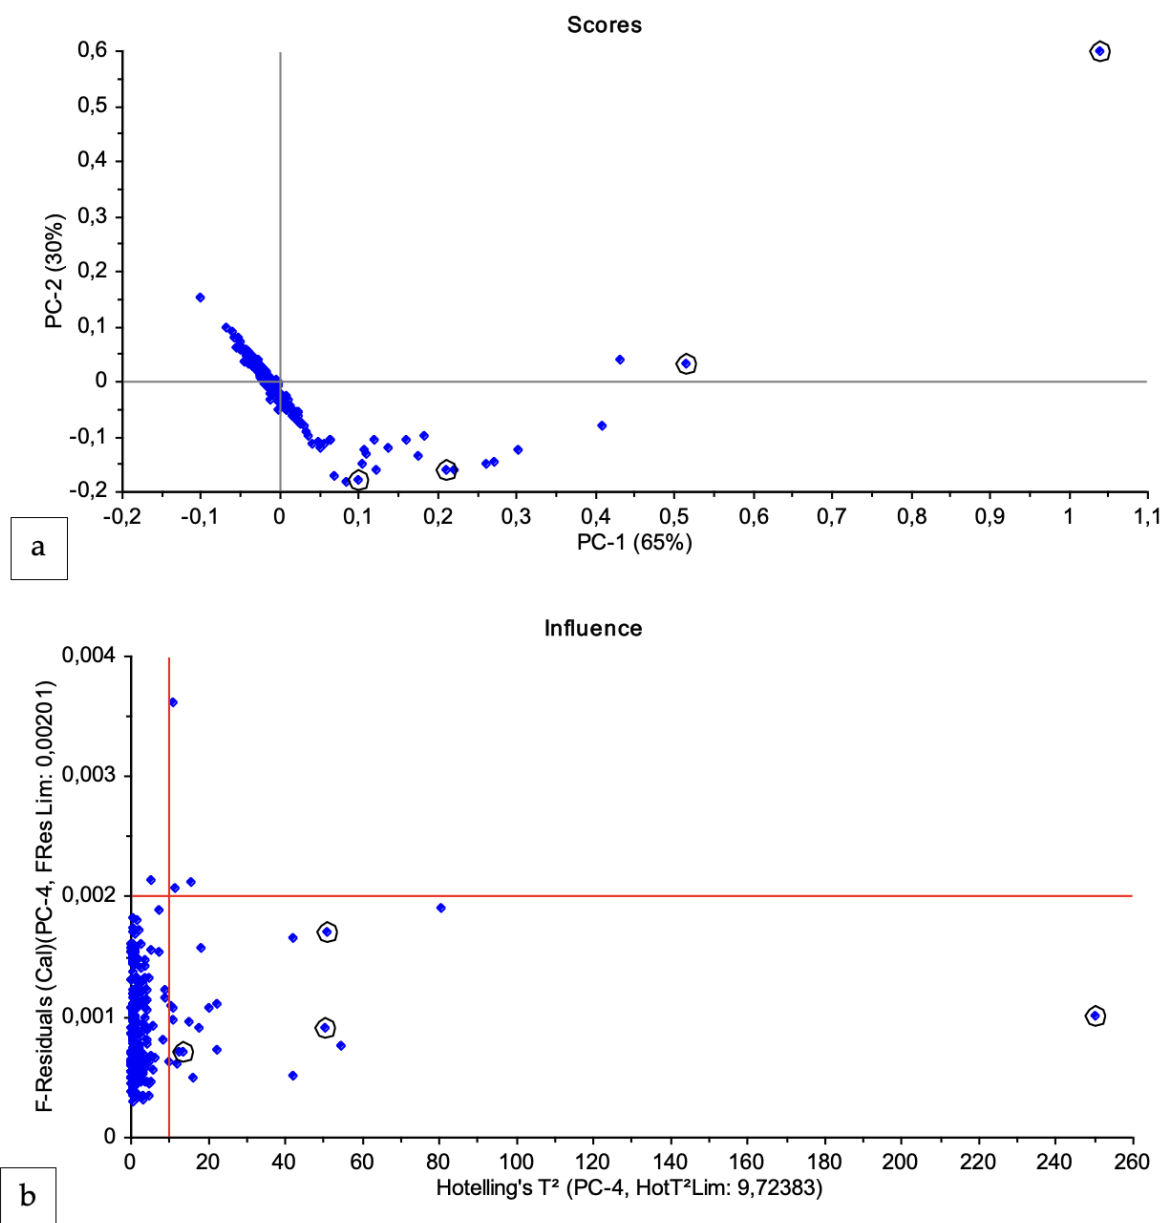

**Figure S1:** Score (a) and influence (b) plot of the first two PCs obtained by PCA for 318 EVOO samples in MPA

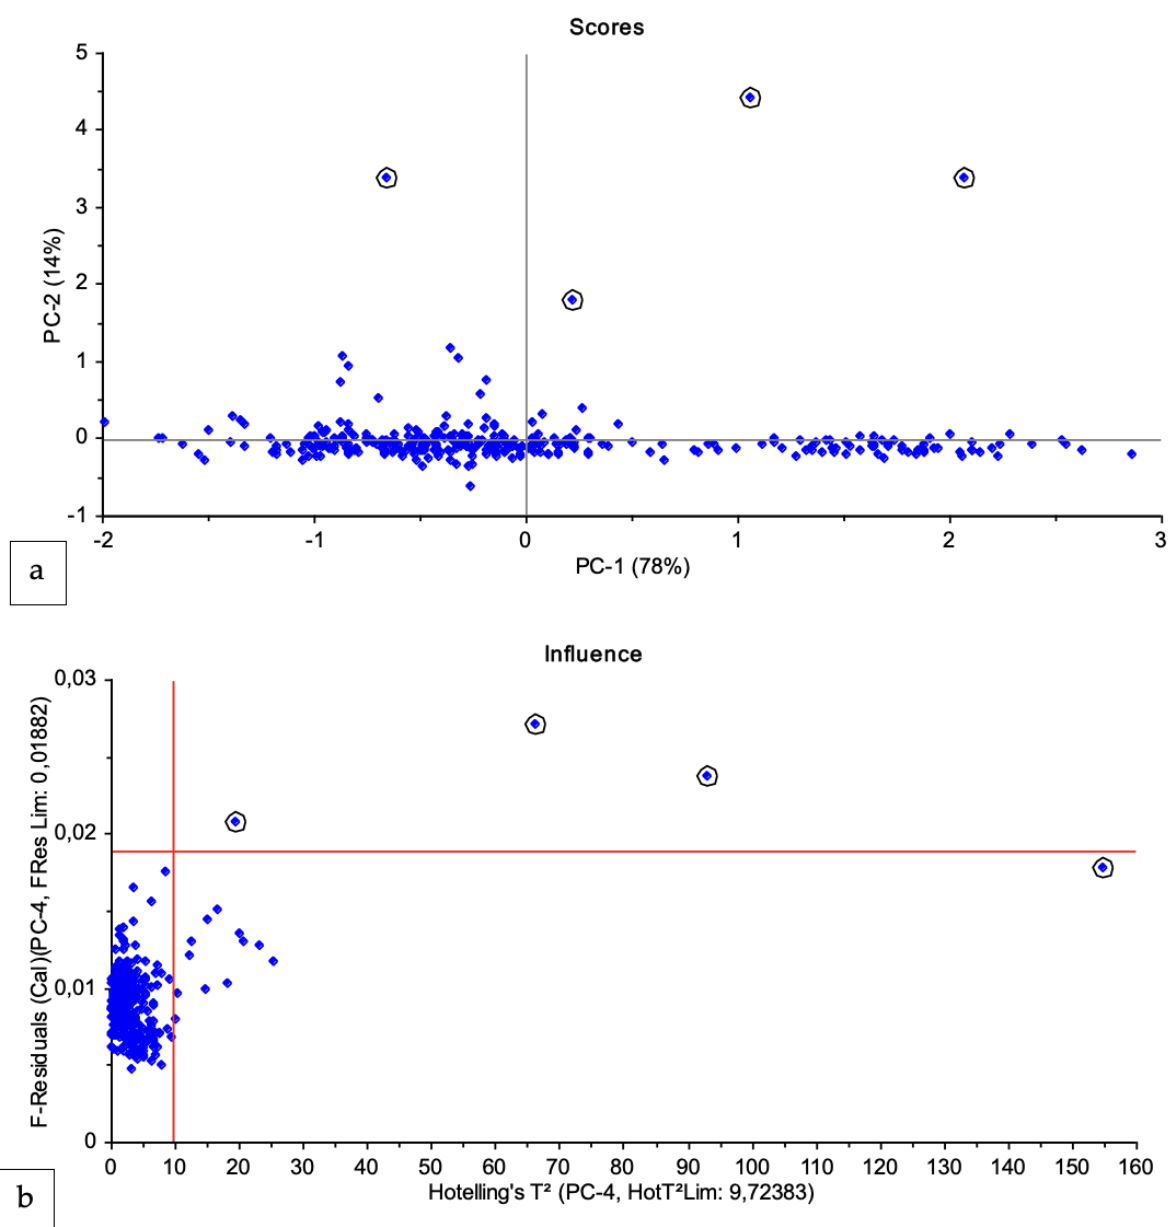

**Figure S2:** Score (a) and influence (b) plot of the first two PCs obtained by PCA for 318 EVOO samples in MicroNIR

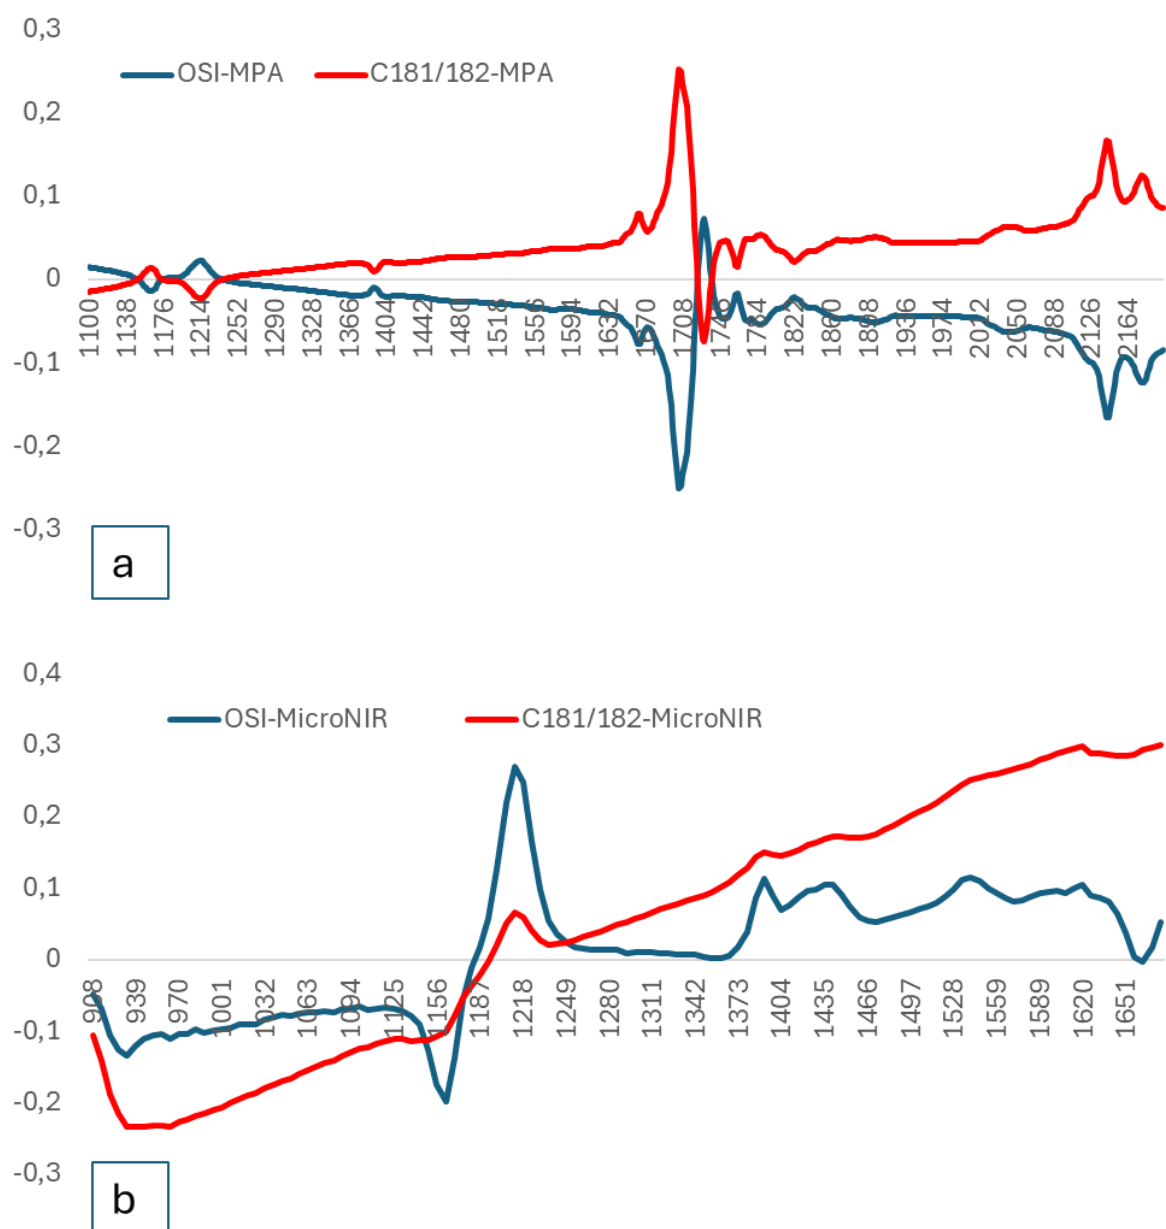

**Figure S3:** First X loading of models developed for OSI and C181/C182 in MPA (a) and MicroNIR (b) instruments.
