# Supplementary material for: Oil Quality Prediction in Olive Oil by Near-Infrared Spectroscopy: Applications in Olive Breeding
Source: MDPI journal article supplement (doi:10.3390/agriculture14050721), 2024-05-02
Supplement: s1 [file s1]

Archive with 1 entries (1 files):
- agriculture-2973817-supplementary.pdf
